# Supplementary material
Source: Springer Nature journal article supplement (https://www.springermedizin.de/resource/supplementary/13014_2012_729_MOESM2_ESM.pdf/9634288)

**A**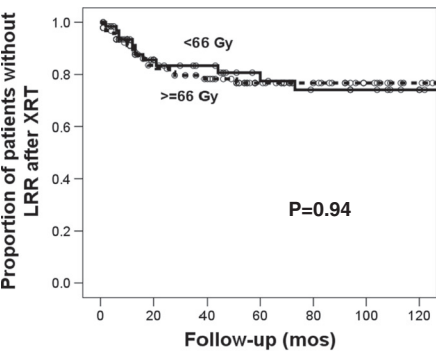**B**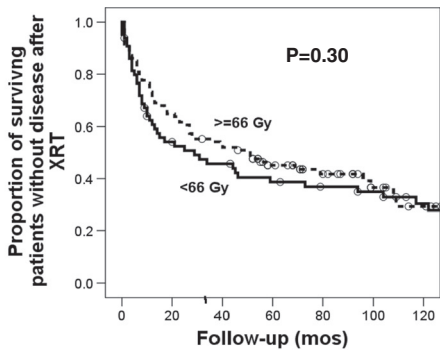**C**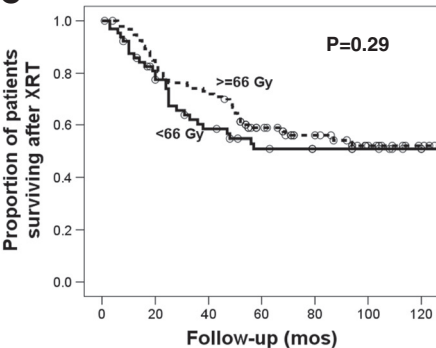**D**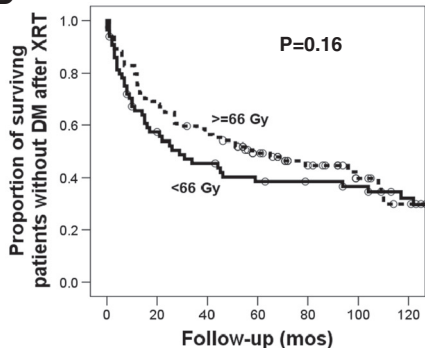

Supplement: MOESM2 [file 9634288]
